# Supplementary material for: NFAT1 and NFAT3 Cooperate with HDAC4 during Regulation of Alternative Splicing of PMCA Isoforms in PC12 Cells
Source: PubMed Central journal article supplement (PMC4048221; doi:10.1371/journal.pone.0099118), 2014-06-06
Supplement: pone.0099118.s002.pdf [file pone.0099118.s002.pdf]

**Splice region in PMCA1 gene (ID: ENSG00000070961)**

**Legend:**

**GGCGTGTGGGTGTGG** - exon

**TTTCCC** - NFAT binding motif

**GGAAA** - NFAT binding motif

**TATAAA** - TATA box

alternative splicing region

**R** - altered nucleotides recognized during splicing

**SEQUENCE BEFORE SPLICED EXON 39 bp**

**Intron 1 - 2**

GAGGGGCCCCAGGTGAAGGGCGCCCGCACTTCTCCTGCGGCAATCATCGCTCTCCTGCCT  
CCACACGTCGCGGCAGCGGCCCGGCCCGCGCCGAAACAGCAGCTGTGACTGACGGAGTC  
ACCTCCCCGCGCGCCTGGCCACCCCTCCTCCCCCGCGCTCCCTCCTGCACCAACACGT  
CATGGAAACACGGACGTCAGAGCCTCTCAGCCAATCGCAGGCTGCGGCAGGAGGGAAGGG  
GCGCGCTGGAGGGGGCGGGGCGAGCGCAAGCCAAGGCGCTCAGGGGAAGGAAGAAAGGG  
AGGGGCGTGCGGAGGCGCAAGTCCCCACCTCCGCCCTCACTCCGGCCACCC**TTTCCC**GA  
CCGCGCGGCAAGTTCTAATCGCCAGGCGCGCTCGCCAGCCGAGGGCGCGCTCGCCGGG  
TCCTCCCTTTAAACGCCCTCCCAGTGCCGCTCAGCTCCCAGTCCCGGTCCGAGCCGCGGT  
TCCTCCGCGCGCGCGCGCAGTCCCGCCCCAGGCTCCCGCGGATCGCGTCACG  
TGACCGCGCTCAGCCAAGGCGGCAGCGCGGCGGCGAGCTTCGGCGGCGGTGGCGGCT  
**GTGGCAGCGGGAGCAGCTGCGCCGCCAGCGTGGAGCGGGAGGCGTGTGGGTGTGGAGAAA**  
**AGGGAGCGCCAGACC****CGA****ACGG**GTGAGCGTTCTCCTCCCCCTGCCTACCCGGCAATCTT  
**GCAGG**CCACCCGGTGCAGACGGGGTCCCTGCCCGGAGCTGCGCGCAGCCCCCTCGTGCTC  
GGCCGTCCGCTCTCCGGTGCCCGCGGGCCCCGCCCGAGTGGGGCGGGCTGCGGCGCTCA  
CGGAGGTGGCTGCACCCCGCCCGCGGCTGCTGTTGCGGACGGCGGGGTGAGGCCGGCTGA  
GCTGCCCGTGCCGAGCGAGCGCGGCGCGCCCTGTGTGCCGCTCTGCGGAGCCGAGGAGGC  
GGGTCTTGCGGGGACGCGGGCGGCCACTCGGTGGCTGCCGGGCTCTGGGCGGGGACGGCC

**Intron 5 - 6**

CATTGTGTAACAACACTGTTATAGAAATGTGAACTACTTCTGCATAATTTAGCATGGCTGTA  
TTCATTTCTTTT**GGAAA**GCTTTAATTCCCATTTTGTTCCT**R**CAG**ATAAGAAACAAGATGG**  
**AGCTATTGAGAATCGCAACAAAG**GTAAATTTAGGAGGACAAAAGTACAGTGAGCTTGT  
TCATTATATCCAAAATCTACTGTATACCATATTTATTCAAAGTAAGATACATGTGGCA  
**GGAAA**ATCAACAATATACGTTAGCTTGGGTAAACCTTTCTTCTTCCGGTGTCTTAGTC

**SEQUENCE BEFORE SPLICED EXONS 154 bp**

**Intron 19 - 20**

GACTTTTAACTGATTATGAAAGAATGTGTCTATATGCCCTAAGCTCCTTTTTTTCCTAGC  
TCCCCCATCCCCACTTCATCTCAAAATGCTATTCTTGCCTATATGCTGTGTAAGAAAGTG  
CCTTTTTCTTTTTATATGTTGATAGATGGAATGGTCCCTTTCTTCTTCTCTCTCTCT  
TGCTGAGCAAGCTGTCACAATCTCTGATTCTTGCAG**ATGGATGTAGTGAATGCTTTCCA**  
**GAGTGGAAGTTCATT****CAGGGGGCTCTAAGGCGGCAACCCTCCATCGCCAGCCAGCATCA**  
**TGATGTAACAAATATTTCTACCCTACACATGTAGTGTTCCTCTTCTACTGCTTCTAC**  
**TACTGTGGGGT**GTGAGTGTGTGTTCCCTAAGTGCATGAAATTAACATTTCTACTTACAC  
ACCTAACGTTTCTCATTTTCTCCTTAATGTTTGAATTCATTGTTTCAGGCTTTTTTCATAAA  
GCTTCTTTTCGTAAAGTGGATTGAGACCTCAAAGTGTGTCGTTGTTGTTTATTTCTT

## Intron 20 - 21

GCTGAACTGGCCTAGTAACGTGCTGAAACTAACCAGACATATGGCTTAAATAGATGTGTC  
AGACAAAGGAAGCATTAAACCTTAATCTTATGGAATGTTTTATTCAAGTGAAGTTAGGGAT  
AAAGTAAATGATCGTATGTTTTTGTCTTCTCTTACTTCCAAGGAACCTGGAATTGGGAG  
CCCAGAAACCTAGGTTTTAAGACTCTTTAGCACTAATTAGGAGTTCCTTAACAAGTCAGC  
CACCCATCCTCTCTGTTGCTCAGTTTTATTATTTATGAAGTGGTTAGAAAAAAAAAATCT  
CTAATATTGTTCAACAAATTCAGATA**GGAAA**AATCTTCTCAGAATTGAAGTTTTGCTAAG  
AAGGGATTTAATCTTTCTTTGCCTGCCACCGGTGTATGTGTGTGATTGTGTGTGCACATA  
TACTTGTGTCCTCACCTTTACACTCTGCCCTCTTAGAGCTTCACTAACTCTCAAATCT  
CTAACTTAAGTTTACACTTTTCTTCTGAGCTCTAGATATTTTCCAAATTTAACATGTTTA  
AAAAGTACATTTA**TTTCC**CCCCGATTCTTCACTGCTCACTTTTATACCGACTGATTACAA  
AGAAAAACAGAT**GGAAA**ACACACACATACACAGAAAGCTTAACTGTTGTTCTATCTTCAG  
TAGCAGCAGCACCAGCAACCTTATCAAATAAGCAACATCTTCAGGGTTGTCTTGAACAGT  
TCTCATCACCCATCAAGTTTGCTGGCTGATCCTCTAATTTGTATTCTCCTCCGTGCCTAC  
GGGCTGCTGATACCAACAAATTTTTTTTTTAGAAAGTTATCTTTTTTGCATTTTAAAGCTTTA  
CAGTTTGTATTATTAGGACAGTCAGGATACTTGCTGAATGTTCACATG**TATAAAA**ATGTGAAT  
TTTAAGACTTCAACAATAAAACACTGAATGAATTACTATAACGTTATATTTAGCAAACATT  
GTTTACATTCCATATGTAGAACACTTTACATCTTAGTAAAGGGGAAGAGGAACAAGAGCA  
ATAAAAGAAGTTGAAAAATATTTGCTGCTATTCATCAGTCAAATTAAGGAACTGAAGTAC  
AAGCAATCAAATAGAATGGAAT**TATAAAA**AGATGGTAAAGCTGCAAGACATTAATAGAATA  
GATGCTTGCTGCTCCAAGTGTGGATCATGGACCAGCAGCTTTAGCATCACCTTGGAGGTT  
GTTAGAAATGCAGGACTTTAGGCCCTGCTGAATCAGAATCTGCATTTTAAACAAGATCCC  
CAACTAATTTGTATGCACATTAAGTTCGAGAAGCCCTGGCCTCGATACTTGTGACCTAA  
CATTGTTTTAAGTTTGTAGTGTGCTAACGAATTTAATCTCCCACAACAACCCCGTAAGGC  
AAGTACCATTGCTATTTCCCATTTTATAGTTGAAGAAACCTGTTTGACCGAGGTTCTCTCA

**PMCA1: 6 NFAT motifs**

Splice region in PMCA2 gene (ID: ENSG00000157087)

Legend:

- GGCGTGTGGGTGTGG** - exon
- TTTCCC** - NFAT binding motif
- GGAAA** - NFAT binding motif
- TATAAA** - TATA box
- alternative splicing region
- R** - Altered nucleotides recognized during splicing

SEQUENCE BEFORE SPLICED EXONS: 33 bp, 60 bp, and 42 bp

**Intron 1 - 2**

GTGTGTGTGTGTGTGTGTGTGTGTGTGTGTGTGTGTGTGTGTGTGTGTGTGTGTGTCTCACTACCAGTCT  
ATCAAGGTAACACTGAAATATCACCATTAATTCTTTTTCTCATAGAGAACTTTCTGCTAGCT  
CTCTAAAGGAATGAAAATAACCTTGGGTAGGTAATGGGACAGGGAGAATCCTAAGTCATC  
AGCCAAATTTATTATTCATTGACATCTCCATTCATCCATTTATTCACTCATCCTTTTTCTC  
CATCTATTCATTTATCAGCCTCTCTAACTACCAATTCATCCACCAGTCCATCCATCCATC  
CACCATCCATCCATCCATCCATCCATCCATCCATCCATCCATCCATCCATCCCCTTCTCTCTC  
CATCTGTATCTCCATATATCCACTTTTCTTTCTAGCCATCCATTCATCCATCTATCCTTT  
CACCAGGTTCCTCACTAAGCATCAATTCTGTGACTGGCTCTGTGGGGTAGAGATGAAAAGG  
CTCACTCAGTTCAGCCCCTGCAGATCCCCCAGGACCCTGGCAGCAGCAGATCTATGAGC  
CCACATTTTCCCCTGCTTGTGAGGATCACACCAAGAGAGACATTACATCCTGGCCTCAC  
AAAGAAGAGATGGCAAAGTGGAAAAGGCCGGAGTCCCCAACCTGAGCCCTTTACCCTG  
TCTCAGTCTTTTTATAACGAGGTGTGTGTGCTTGGGCAATGCCTCTCTCTTTCTGGGACTCA  
GTGTACCCATCTCTGCTGTGGGGAGGTGGACTAGATGAGAGTTTCCCAAACTCCAGTTG  
TTTTTTTCCCCTCCACACCTGGAGATCAGAACACCTGTACTAAAAAGTACTGAAAAT  
CTTTATTCAAATGAGCTCACTTTTTTTTCAACCAAATAAATTTATTGAGTGAAGTGA  
TATTGCTACCATAAATGGAAAATAAATGGTAACAGCTGTCATAAATAGAAAGTAAACAATT

**Intron 2 - 3**

AAGCTGACCTCACAGCTAAGCAGAGTGGGTGGTCGCCTTAGTGATGTGAGTCGAGGGGTG  
CCAGGCAGCTCCCTCTGCTGCAAATCCCTCCCACTCACCAAACTGCTGCCGCCTGCAATT  
CCACAATGAGCACTTTAGTCATCAAATCATAAAATGTCAGCTTGTAAATAGCCTTGGAAC  
CTGTCTAGTTCAAATTTCCCAGCTCAGAGTGCTCTTGGAAAGATACCTGAACGGGCCCTTTA  
TTTTTAGAGTGAATTAGTGGCAGAGCTGGAACCTCGAGTCTGACCCTGCACAGTGAAGGACG  
CTAGAGGCATCTGCAGCTTCTTCAATGGGAAGGTGGGTTCTGAGTCACAAGATGGGCAGC  
TCCCCAACAGAGGAAGGGTTCAGACATCAGGCATCCAAAGTAAATGACCAGTGTCCCTA  
GTATTTATTTAGCCCTCACATCAAATGTCAACTTATAAAGAAAAGAGGCGACAATATTCC  
GTTGAACGTTGCCTTCTCTTCAATCTAACTAATTCATCCCAAGTAGGATCCATTATCTG  
ACTGTCTCATTATAGTCACACTGGAAAAGCACATCTTGTGTTGTTATAAATGACTTTTCAATT  
TATTTCTCTTCTTTATTACAGTTGGGGCATCATATGCCTTTTTGAAATTATGTGTATTGG  
TAGGTTATATGATGTGTGAATTTTCTTGGAAAGATAAAGAAAAAAAGTAAAAATGATGTTGG  
ATCCAATGGGACCAAGAGCCACCAGCACAGTGGATAGAAACAAGGCCCTGTACTGAATC  
CTGCCCTGCCTCCTAATTAGCTAGGACCTTGTCATATGAGCATGAACATCAGCTCTTACCC  
CGGGTCTCTGAAGTCATTTATTGAACTTGGTTTCCCCTCACTAAGTGGGGTGAACAGTGG

**Intron 3 - 4**

CTACCGCGCACCAACTGAGCTGGGCAGTGGGATTTTACAGCAAATGAAAGCAGTCTAG  
GGGACTAACGTGTCCAGGTTTGTCTGGGACATTCCTGATTTTAACTGAAAGTCCCAC  
ATCCCAGGACACCCCTCAGTCCGAGGCAAACCAGGACAGTTGGTTCATCCTAACACAATCT

CTGCCCTCATGGATTTACAGTTTAGTGGAGGGACATAGACAATAAGTAAATATATAACAT

### **Intron 7 - 8**

GACTGCAGAAGGCCAGTCTGCTACTCGGC **CCGCACTCTCTCCATTACACTACCCTGCCT**  
**CTTCTCCATGAGAGGCAGCGGGGTGTAGTGGATAGAGCACGGGTTCAAGTCCCGGCTCCA**  
CCACTCACAGCTGTGTGACCCTGGGCCATCACTCAAGCTCTCTGAGCCAGAAAGTGGTGG

### **Intron 8 - 9**

AGAAACCTCCCTCCTGAGTCCCCTGGAGAATCAAGAGTTGCCCGGCTGGCAGGCCCCACA  
GCTAAGGTGCGGCCAGGCCTGCTCCTGCTTCAGGGCCCTCCCCAACCCGTATCCCCACAC  
AGAGGGATGCAGTCAGCACGGCCCGCCCTTCATCTGTGACATTAATGTCTGTGGCCTGTT  
GCGTCTTCGTGATGACCGACCATGTGTTGTCTGTTCTCTGTTGTCTGTTAAAATTCTTTG  
TCGTGTA **GTAAAATGCAGGATGGCAATGTGGACGCCAGCCAGAGCAAAG** GTAACC **M**TTT  
TGTTTTAACC GGCGTTTGTGCTCCCTGAGGCCCTCCCCACCGGCTCTGACAGTCACACC  
AGAGACAGAGACTGGCAAGGGCCAGAGGCAGACACATCCACTCCTACAGGTGTCTGACGA  
CCTTGGGGGTGTAGCTGTGATTTGCATGGTGCCAGGCCAAATAAAGAGGTGTCCACCGGT  
GAGGAGGGGGATACCCATGGGCCAGCATCTCCCTAGCCTTTGAACTCTGCGCCCCATTCA  
GCTGAAGACTTTGAGATCCTTAGAGGTTGAGGGGTAGGGAGTTTGGCTCAGTCTCTGTCC  
AAAAGGGTCACGGGCCCTCCAGTCCATCCTGCATGAAGAGGCCACGCCAACTGGGATAGT

### **Introns and exons 7, 8, 9**

ACCTGCACTCCTGTGAGATGGAGATGTCAGAAAAATAGCCTCATGTAGAAGGAAGATGGG  
GAATGTGGAAGGGATGTGGCAGAGGAAGCCTGGGGGAGCAGTCCAGCATCTCAGGCCACC  
ATGAGCAGCATGGCCTCAGCTGGGCCCCCTCTGCCCTCCCATCCCATCACCTCCACTAGG  
AACATTGCTTAGAGCCCGCCACATGTCCCCATTTAGGATGACCCTAGGTGTATGGCCAT  
GTGTGTATGCACATGTGTGTTTGTGTGTGTGCGCGTGCGCATGGGCAGATGAGGCTGTGT  
GCTTCTCCTTCATTAACATGTCTCAAAAATCATCACA **Y**AG **GTGTGAAGAAGGGGGATGGC**  
**CTTCAGCTACCAG**GTACAGTAAGACACCCTCAGGGTAGATGGGCTTTTAGAAATAGCAGC  
AGGCTTTGGTCATTGGGCCCTGCCCCCTAGACCACCAGCACACAGCTGGAGGAGGCCACAT  
GCCTGTGGGTGGCTCCACCCCCAGACCCTCCTTTGTGCCCTCCTGTGATGCCAGCCCTG  
TGGGACAAGCCAACACCCCACTCCACCCTCTTGCCCTTACAGTGCCTCACCCCTACCAGCC  
AATGCCAAGTGGTACCACCCCATCTCTACACCACCCTTAGCCCTGCGTACCAGCATGCA  
AAGCTTGCTCACCATCATAGGACCCTCCCCTCAGGCCCTGCTCTCCCCACCAGCACCCCT  
GGGAGCCCATGCCCTCACGCAACAGTGTGCTTCACCCAGTGGGGCCTCTTCTGCCCAT  
AGAACACTATTCCCTACCCACAAGAAAGAGCAAAAGGTGTGAATTTAGCCATCTCATATC  
ACTTTTAATTTCTAAATTAAGAAAAATTCAGTAGTGCT **TTTTCC**ATCCCATATACAAAAT  
GCAACATGCTTGATGTCACCTTTTAAATTTGGGGGGCATCTCACATGGGAGTTCCCAAAG  
CAGTCTCTGGAATGCCAGTTAAGGAAGGAGGCAATGGCCTGAATCAAGGGCATGAATCCA  
GTTAAGTCAAAGTCATCACCATTAGCAAATGTTCTTCCAGAACACCCTGATGCACAGAGA  
TGGTGGTCATGGAGAATACTCATTCTGAGTGGTCCGTGCCACGCTGCACTGCCTAGTGA  
ATATTTTTTCCACTCCTGGCCCCAATGGGCAGCCAGATCTCCTCATTTTATGGAGCCCTC  
TCTTCCAGGGGACTCTCTTGACTGGTTGGACCAGCAGGGTCCAGACCTCAGCACAGACCA  
GCACCATCCCAGCTAACCACCCTGGTCATCCACCATGCTTTATTTGAAAGACCCTCCATG  
TCTGAGTTTCTCCCCTCAACCTCTGCGGCATCTCTATGGAACATTTACACCCCAACCCCAA  
ATTTGAGTTTCTTGGTTTCCAAAGGATAATTTTTTTTTTTAAGAATAGAGTCATGTTATC  
TCCCACAAGTTGGTTCATGTCTTTGTGCTTGTGCTTTTCTCCATTGTGACACTGCATT  
TTCCATCCCTCCACCC **YSS**TG **Y**AG **CAGCAGACGGTGCGGCAGCTTCAAATGCTGCAGAT**  
**AGTGCGAATGCCAGCCTAGTCAATG**R **T**ATGTCTCCACGGCGAGCTCCTGGTCATGGTTG  
GATGGGCGTCTCTCACCCCAACCTTTGGGCTTTCTTTCTTCTGTTCTGGACTGCAC  
AGATCTCGGATGTGCATGGGCCGCTGGGACAGTCACCTTCTCACATGGGGCAGGCGCTTA

AGACAGGAGCCACAGCCGGGGGAGTCAGCTCTGCAACCTGTCAGCCTCACAGCTGCCAAA  
AAGGTGCTGGCTCCTGTGCGAGCCCTTGACTCCCCATGGAGCCCAGATAAGAGACGAGACT  
TTGGCTTCAGATTGGCTCCCAAGAAGGAGCGTCCCACCTGGCATGGCCCTCTCCTAAGTG  
TATTCCTGGCCCTGGCTTTGGGAAGAAGGCCTGGGATCAGGGCTTGGGCTGAAGCTGGCA  
TCTGGGTCCCCAGCAAAGGCTCTAGTCCTCGACTCTAAAATTTCTCGAGGCAAGGGGAC  
CCAGGCCGGGATTCAGCTCCTTGGCCCTGTCTGTAGCATGGCTGAGCCAGCAGTAAACA  
GTTTTTCTCTTCTCTTTTCACGGAGCCAACGGGCAGGGGGTTTCGCTTGGGCTCGGGCCTG  
GTTCTGTCTTTCGGATGTGGACTGGTGTTCCTTGTCTGTTGCCTGTGCTGGAGCGTTTGTG  
CTGGGTACAGGGGTGGAGGGTGGGGGAGAGGGGCTGGCACTGTGTACTGGTGTCTGCAT  
CTTAATCTCCTTACACGCAAGCAAGAAGGAGTTCATTCACTTGCCCCCAAAGCCTTTAG  
AAGATTTTCGGATTTCTATCCCCCTTCTGGCTTCAGAGCAACAGACAAGGCTTTTGTACT  
CAGATACCACCCCTATCCCCAAATAAAGTGACATAATAGTCCCCCAGGCTACTCCTGAAC  
TGTTGAGAGCCATTAGGGCTCCATCATGAAAACATTGCCCCAGAGGAGCTGAGGGCAGGG  
GAAAATCTTTTTCCACCGTCTCTGCATAACCAGGCACTGGGCTGTGGGTTTCTCATCCAT  
TATATCATATCATTCACTTCTCACCCTCCTGCAAAAATATGGAGACTTGTTCGCCCGCAGC  
CTCCCATCCCCTGCCCTAGACCTCTCCCCAAGCCACCTGCATTCAAAGTGCCCAAAGATG  
GAAGCACCTAGTAGGTGTCGGGGCTGAGTAAGGCACTTCTGCGAGCAGTGCCTTGCCAAG  
AAGGACTAATTCTGGTATGGCTCTATTTTCAGGCACAGGAGGAGGAAGGATGACAGCTTGG  
GGAGTGGGAGGTGTCATGCCTCAGGGAGGGGTGGCTGAGGGTGACAAGGAGAACCCATGT  
GGGCAAACCCATGGCTGAGAGAGAAGGAACCTAGAGGGGGCACCCACTTCACCCCGGCAG  
TGAGCCTGCTGAGCTTTGTGAACATAACAGACCCCATCCAGGCTGGCCAGTCTCAGAAAA  
AGGGCAGCTTTACTTCCAGACTGCAGCAGAAAACCCCAAATATCCCAAGAGAACTGTAG  
GAAACGTTCAATTTCTTGACCACCTACTGTATAACCAGGCACTGCTGAAAGCATTTTCATATT  
CACCATCTCATTTAATCCTCATGACACCCCATGATACAGGTTTTTATTGTCCCCACTTTA  
AAGATGAGGAGACTGAGGCTCAAGGAGACCAAGACACTAGCCTAAGGTCACAGAGCTAGA  
AAGTAGCAGAGCTGGGATTTGAACCCAGAACCAGACCTGGCTGGCTCTAAAGTGTGTGC  
TTCTCCTCCTGATCCAGGATTTCCAGTGGAGTGTGTCTTGTAAAGTTTCACAAGGATGTT  
AAGAGGGCTTTACCCCAAGAAAAGGATTTCTGTGGTCAAAGATGTTTGAGAACCCTGGAT  
TGAATTGATCTCTTCTGGTTACAGAAATTAGTCCTGGTTACAGGACTGCTCAGAGCCTTG  
AATATGCTGGTGTGTAGCGGAGAGTTACAGAGTCACATAGAGTTTCCTAGGCTGATTTGA  
CTGCAAGACCTTTCTGGCTGAATCCTGTGGAATTGGTCTGCCCCATAATATACTCTGGG  
AAATAATGCTCTAAGCCATTGCTATTTCAAATGTGATCACAGGACCCAAAGCCTGCACAT  
CACCTGGGAGCTCCTTAGAAATGCAGAATCTCAGTTTTTTTATTTTATTATTATACTT  
TAAGTTTTAGGGTGCACACGTACCCTAAAACCTTAAAGTATAATAATAATAAAAATAAAAAT  
TAAAATTAAAAAATTAAAAAAAAGAAATGCAGAATCTCAGACCCCAACCCAGACCAACT  
GAAGGAGAATCTGCATTTTAAACAGGCTTTCCAGACTCCAGGTGAGAGCACATTACAGGTG  
GAGAGGCACAAGGTGGAACCTTGCCGATTGAGAGAGAATTAAGTGTCTTTCCCTCCTT  
CCTCTGAGCCAGATCACAATGACTTGGATATGGAAAATAAATAAATAAATAAATAAATAA  
CCCTTTGACCCTGCTCCCCAAGCCCCCAACTGAAAAATGGGTGTGGTCCATTCATCTTG  
GAAGCATTATGATTGCCATTATTATTTAGTTATTTTTCTTTTACATTACTAGTGTGTAC  
TATGTAATACATGACCTGTAATCATGGTTATAATCACAGTTAATTATAACATCATGAGGCC  
GGCGCAATGACTCATGCCTGAAATCCCAGCACTTTGGGAGGCCAAGGCAGGTGGATTGC  
TTGAGGTCAGGAGTTGGAGACCAGCCTGGGCAACATGGTGAAACTCTGTCTCTACTAAA  
ATACAAAAAATAAATAAATAAATAAATAAATAAATAAATAAATAAATAAATAAATAAATAA  
TAGGAGGATGAGGCAGGAGAATTGCTTGAACCCAGGAAGTGGAGGTGCACTGAGCTGAG  
ATCATGCCACTGCACTCCAGCCTAGGAGACAGAGTGAGACTCTGTCTCAAAAAAGAAAA  
AAAAATTATACATCATGGGCTGGGTACAGTGCTTCATGCCTATAATCCCAACACTTTGGG  
AGGCCGAAGCAGGAGAATCACTTGAAGTCAAGAGTTTGAAGTGGAGGTTGCACTGAGCTGAG  
GAGACCACATCTCTACAAAAAATAAATAAATAAATAAATAAATAAATAAATAAATAAATAA  
ACATCTATATTCCCAGCAACTCAGGAAGCTGAAGTAGGAGGATTGCTTGAAGCCAGGAGT  
TCAACGTTGCAGTGAACCAAGATCACGCCACTGCACTCCAGCCTGGGCAACAATAAATAA

AACACATTACTACTAACTCCCAACGTTTACACAGTGATTTTCCAGTGCCTTTCATAAACA  
TCACCTTAGTTGATATCCATTTACAGAGGAGAAAATGGAGGCACAGGGAAGAGAAGTGG  
TATTTCCCAAGTCTCCCAGGTAGTGGTCTCTCTCCCAGAGCTTGTGTATCAGGTCAGCT  
TACCAGGAATCCTCCCAATCCATGCACTTACACCCATGCCCTTGTGTATGCACAGAGAG  
AATAGACCCATTT**GGAAA**AGGTGCATCTGACTCCAGATACAGAGAAGGGCCTCTGAGACC  
CCACCTGAGGGCTCAGTCTTGGACCCCATTCCTAGCTCTCCTGAAATACAGCCCATCTCC  
AGATCCCACATGGGGCCAAAGCTGGCTGTTCCACCATAGTTTCAGGGCCAGGCGAGCACCA  
GTTTGGCCAGGAGAGCCCCAAATAAGTCCCTCGCTTCTGAGAAACCAGGCCATCTGTGCC  
TCAGCACTCCCAGAACATCCTTCCCTTCCCTCCAGCATATGCATTGGTGATTATTTTTCTG  
ATCACGTGTTCACTCT**GGAAA**TAAAAGAGGAAAGTGCTAGCTGGGCTTAATGAGTGCACA  
CACCGGCTATTGCATCTGATAAATATGCAATGCAAATAAAGGCCCTTTGAGCCTTCTAAA  
ACCAACTATTGAAGTGGAGTCCCCTGGTGCCCCTGAGCCCAGTCAGTAAAATTATTTTAG  
AAAATAAAAATAATTGTTGTTATTCATTCCTGCTTACTCTAAAAGCTTTTTTCTCTTGT  
GTTTTTTAATCCAGTAGAAAGAATTTTACAGTAGAGACACAGGGGGTCTTTCACCTTAAA  
GCCCAGGATGGGCAACTGATCCTTTGCCATGGGAGGCCATGGGGACAGCTCTGCACTTAC  
CCTTGAACAGACAGTGTGGGCGAGGTTCCGGGAAGCCACTTCTCCCCTCTGAGTCACCC  
AGAAAGTGGGCACAGTGACAGTGATGAACTAATCCTGCAGCCATGGGGCTATTCCGAGGA  
TGCTCCTAAATTCAGGCTGCCTCTGAACTTCCCTTGGCCTCAGTTTCCCCTCTATAAAA  
TGAGAGTGATGAAAATCCCTCCTGCCCCACCTTGCAGGGATACTGGGAAGACTGACAAGA  
GATGACACTTGCAAAGCCCTTTGAAACTGCAAAGGCTGAACCGTGCAAGTGATTATGA  
TGAAGGTAAGTGGGACACTCTGGGAGGTGAATGTCTCATCCTGTTTTATGAAAGTGGAA  
CTTGATGAGATTGGGAGATAGAAAGCCAGCAGCTAGTTGGTGGTGAAATGAAGACTTCAG  
GAACCCTGTGCGCAGCAGTGCCACCTCAACTTCCCTCCCCTGGGCTCAGAGGGGGCTGAGGG  
GTGTCCATGGTCTCCCTGACGGCAGCTTCTGGAGAAGCAATGGCAGGACGGAAGTAGGCA  
CGCACTTTGGGGCCAGCTCTCCATTTACCCATTGAGACCCAAGCAGCTCATCTCCCTCTC  
TGAGCCTCAGTTTCTCATCCATAAATGGGTATAATACAAGCACACCCTTCATAGGTGAGG  
CTGTGGCGAGGATTAGATGGAATCTCAGAGCTTATGTGTGTGCCCAGCACATGGTGGTGG  
ACTGTCCCTGGAATGTGAGCTGTGAGAATCACCATTCAGCCATCATCCAAGGGTGGCCAA  
CCTTCTCAGACCCCTCCCAAGGGGGCGAGGCCGTGTTGGCAGAGCAGGCAGAGCTCTGGGT  
GAGCGTGCAGGCCCAGTAGATGGGAGGGTGTGCTGGCGAAGGCAGGTGTGCTAGGCAAGAGA  
CAGAGGCCTCCATTGCCACATTCACACCCAGCCACAAGCTCCTGGCCAAGGCTGGAG  
TGGGGGCCTCCCAGGCAGCTCTGATGAGTCCGGTGGGGGGCAGCCAGATGCAGCACCAGGC  
CCTGGTATGGAAGGGGATGCCACGGACACTACTTAGCCTGCTGCTGTAGCCTGAGCCAT  
ACCCCTACCAAGGGGTCAGCACCCCCATTGGGGACCAGAGCACTTCATCAAGAACCCGGC  
CACACTTGAGGTCCCTCGTATAACCACCATGGGGACCCCTGATCACTCTTTGTTCTGGTCA  
CTCTCAGGGGCATTGGGCAAGGGGTATCCTTGGGTGGCTTACACTCTTCAGAGTGTGA  
AGGAGAAAAGATCATCCCTCTTGAAGGCCAAAATAAGGAACACATTGACCTCAGTGCCTT  
GTCCAAACTCCTCTCCATTCTAGAAACACTCTCTCCTCTCTCTCTGTCTCTCTTTCTCTC  
TCTCTCCCCTCTCCCCTCTCTCTACTGCATGTTTTCTTTTGTG**GGAAA**ATGAAAAGGAC  
GTAAGTGAACAAGCTTCCCTTTGCCTTCTCTCAACCAGAAAACACCAAATCGGTCACAA  
AAAGCTTGGTGTGGGGGCCTGAGTGTCTCTGCTGCCTCCTCCAGCAGACTCTAATCCC  
CTGCACCCTCTGATACTTCCCTTTGATCTGTAACACGCTCAAGGCCAAAAGTATTCCAGC  
AGAAACCTCCCTCCTGAGTCCCCTGGAGAATCAAGAGTTGCCCGGCTGGCAGGCCCCACA  
GCTAAGGTGCGGCCAGGCCTGCTCCTGCTTCAGGGCCCTCCCCAACCCGTATCCCCACAC  
AGAGGGATGCAGTCAGCACGGCCCCGCCCTTCATCTGTGACATTAATGTCTGTGGCCTGTT  
GCGTCTTCGTGATGACCGACCATGTGTTGTCTGTTCTCTGTTGTCTGTTAAAATTCTTTG  
TCGTGTA**RGTAAAATGCAGGATGGCAATGTGGACGCCAGCCAGAGCAAAG**GTAACC**M**TTT  
TGTTTTAACC GGCGTTTGTGCTCCCTGAGGCCCTCCCCACCGGCTCTGACAGTCACACC  
AGAGACAGAGACTGGCAAGGGCCAGAGGCAGACACATCCACTCCTACAGGTGTCTGACGA  
CCTTGGGGGTGTAGCTGTGATTGTCATGGTGCCAGGCCAAAATAAAGAGGTGTCCACCGGT  
GAGGAGGGGGATACCCATGGGCCAGCATCTCCCTAGCCTTTGAACTCTGCGCCCCATTCA

GCTGAAGACTTTGAGATCCTTAGAGGTTGAGGGGTAGGGAGTTTGGCTCAGTCTCTGTCC  
AAAAGGGTCACGGGCCCTCCAGTCCATCCTGCATGAAGAGGCCACGCCAACTGGGATAGT  
GACTTGGCTCCCATGGCTGCCCTCTTTTACGTTCTAAGCCTCCTTTTTTGTCCCTCCTGT  
CGAGTGGCTACTTAATATCCACACAACAGGTCCCAAGGACCAGCTGGGTAGAGCCCAAGCC

**SEQUENCE BEFORE SPLICED EXONS: 172 bp, 55 bp**

**Intron 22 - 23**

TCAAAAAAAAAAAAAAAAAAAAAAAAAAAGACATTGTCAAAGACTGGGCTGAGGAACAGGTGA  
GGTGGGTGAAGGAGTAGATTGATCACATGCCTGGGTGAGCGGGTAGGAGGAGGGAGGTAG  
AGGAGCGGGTGTGAGGGAGAGAAGGCCACTGGGAAGGACAGCCCCACCGTCCTGACAGAC  
AGGGTCCCTTGCAG**GTCATCGCCACCATCCCGACCAGCAGACTCAAGTTCCTCAAGGAGG  
CAGGCAGGCTCACACAGAAGGAGGAGATCCCGGAGGAGGAGCTCAACGAGGACGTGGAGG  
AGATCGACCACGCGGAGCGGGAGCTGCGGCGGGGCCAGATCCTGTGGTTCCGAGGCCTGA  
ATCGGATCCAGACACAG**GTAYAGGAGGCTCTTGGGGGCTGGGCCAGGCCTGGCCGGGGC  
GGGCCAGGGGATGGAGGTGAGTGTGCTTGTGCTGCCCCCAGGGCCAGCTCTGGTGCTG  
AGGGAGGGTGGCTACAGAGGGGTCCCGGCCAGCTCTCACCAGCCACTTGCACACCCACTC  
CTGTGGCTGCTAAGGAACAGCACGGCCTCCTCAGAGAGGTCCCATTGTGCCCTCTCAGGG  
CAGCACGGGGAAGTGGTAGGGGTCACACCCACCATGGTCTCCAGGGGGA**TTTCC**TGAGA  
TGTCCACAGTCAAGGCACCAGATGTGGCAGAGCCAGGATGCAAGTTGGGTCTTTCTGCCT  
CCAAGTCCAGTGCTC**TTTCC**ACTAGCCTTGAAGACTCAATGACCAGCCTCCTCCCATTCT

**PMCA2: 16 NFAT motifs**

## Splice region in PMCA3 gene (ID: ENSG00000067842)

### Legend:

**GGCGTGTGGGTGTGG** - exon

**TTTCCC** - NFAT binding motif

**GGGAAA** - NFAT binding motif

**TATAAA** - TATA box

alternative splicing region

**R** - Altered nucleotides recognized during splicing

### SEQUENCE BEFORE SPLICED EXON 42 bp

#### Intron 2 - 3

AAGGCTCCTGTCTAGAGGGAGAGCCAGGCGCTGGCCAGACGGCCCCAGAGGGCTGCTGCC  
ACCCAGGAGCAGTCAGTCAGGGCCACATAGGAGGCCTGGGACACACAAGGCCGACCCGT  
CCCATCCATCCTCCCTTCTGTGCTTCCGGGGCACCATGCAG**GCCTGGCGGACAACACC**  
**AATGACCTGGAGAAGCGCAGGCAGATCTACGGGCAGAACTTCATCCCCCAAAGCAACCC**  
**AAGACCTTCTGCAGCTGGTGTGGGAGGCCCTGCAGGACGTGACCCTCATCATCCTGGAG**  
**GTGGCTGCCATCGTCTCTCTGGGCTCTCGTTCTATGCGCCGCCAGGAGAGAGTGAA**  
**GGTAA****RS**CCCGGGGGCCTGGGCTGGAAGGAGGAAGAGGAATGGGGCTTGAGATGAGGGAC  
GGTCACAGGATGGTGATGTCTCCTCCACTGCT**TTCCC**TTCTGTCTCTCC**R**CACAG**CCTGTGG**  
**GAATGTGTCGGGAGGCGCAGAAGATGAGGGCGAGGCCGAAGCTGGCTGGATCGAGGGGGC**  
**TGCCATCCTGCTGTCCGTCTGTGTGGTGTGGTGCACGGCCTTCAATGACTGGAGCAA**  
**GGAGAAGCAGTTCCGAGGCCTGCAGAGCCGAATTGAGCAGGAGCAGAAGTTCACGGTCAT**  
**CCGGAACGGGCAGCTCCTCCAGGTCCCCGTGGCTGCGCTGGTGGTGGGGGACATTGCCCA**  
**GGTCAAGTAYG**GTGAGTGCCCTGGTCTTACCCACCCTGTCAAGGAAGCTCGGCTCCTGC  
TTCTGGGGAGGGTGAGCCAGAGGAGACCCCCAGCACAGGTTCTCCCCGGTGGCCTGCGTG  
TCGTACCTGCCTTAGGAGGCGGGAGGTGGCGGGGGTGGGGGAGGTGGGGGAACACGGGG

#### Intron 3 - 4

CAGGGCAGAGTGGTTTCAGACACAGCAGGCCCCCGAAGAATCAACTGTCCCCACAGCCTC  
CACGGCGGGCT**TTTCCC**CCCTACAAAGGATGCAAATGTCCTCG**TTCCC**CAGAAGGAGGAGG  
GCTCCTGAGTCC**TTTCCC**AGGCGGCCATGGCACCTGACGGGACCTCCCCTGGGGCAGC  
CGGGAGGAGGCGGTGGGGAGAAAGGCCTCTGC**TTCCC**GGTGCT**Y**TAG**GCGACCTGCTGCC**  
**AGCCGACGGCGTGCTCATCCAGGCCAATGACCTCAAGATCGACGAGAGCTCCCTGACGGG**  
**CGAGTCTGACCACGTGCGCAAGTCAGCTGACAAAGATCCCATGCTGCTCTCAG**GTGAGGG  
CCACCCTCCGGGCCAGCCTGGCACCAAGGGGCGTCAGCAGCCGTGTGGCCAGCATCCTG  
TCCAGGCTGCCTGCTGGGCTCAGCCTCCACCTCCACCAGGGCCTTCCAGCATAACCTTCA  
GGTTGGGAATCTGAAGACTCCGCCCGTCTTGAGGCCTGATGGTGGCAGCTCCAGCCACAG

#### Intron 6 - 7

GTGCTGGGAGGTGGTGACGGGGTGAGCCTGGAGAGGACGGGGCATGAAGAAGGCCACCAG  
CAATCAGGCCCTCCTCCCCACCCCTCTGCCACGCGGGCCCCAGGCTGGTGTCTCAAG  
CCTTCGTGTCTGTCATCCCTCTTCCATTGTAG**GCAAGCAGCAGGATGGGGCCATGGAGAG**  
**TAGCCAGACCAAAG**GTAACG**R**GCGCCGCTGCTTGGGCACAACAAGCTTGAGCCCTGGGG  
GTGGGGCTGGTGGAGGGCACAGTGTGGGGGAGGTTACCTGCCTCGGTGG**CAGGAGCAA**  
CACTTGAGAC**CAGG**TGAGTGGGCTGGCTGCACAGTCCCGTCCAGTGCAGAGGGAGGAG

SEQUENCE BEFORE SPLICED EXONS: 154 bp, 68 bp, and 88 bp



**Intron 19 - 20**

GATCTCTGTGCCGGCCACAGGGGCTGCTGCAGCTGCTGCAGATGCCAGCCTTCTTGCTGG  
CCCCAGCATTAGTGTCTCGGGGACAGCCCACCCAGTTCCCTGTTTCATTTTCAGAATTCT  
CCTTTCCCTCTGCTACTGCACCTCACCTCCGAATCACACTTGAACCTGGTTGCTCCATGG  
AGTCCCTTACCTTCCCGAAACCTGGACTCTAACCACAGCCCAGAGGGGTGCCAGGCCCTC  
TTCTTGCTCTTCAAGCTCCCAGGCCACTGGCCTTCTGGTCCCCCAGGAATGTGGCACCA  
GCCTGTAGCTCGGCCTCTCAGGGGCTACTGGGTGTCCTTTTTCATTTTTTAACCTTGTTTCA  
TTACAAAGATAAAAACATGTTCAAGAGAAAAACGAAAAGAAGGGAATCTCTGTGAACCAGT  
CCTCAAGTCCCCTCCTGGCCATGTTTCGACAAAATACACTGGCATAGACACACAAGACAGAC  
GAGACGTCTTGCTCTAGAACTCCAGATGCCCATCATCCCTTTCTGTGGCTTCCCTGCGT  
CCTTCTAGACTGTTCCTCCACTTCCAGTGGCCTACAATATGCGAAGCCATGCCCTCTC  
TTTACTCCTGCCAGGCTCCTTATCCAGTCACCCTTTCCAGCTGTCACCCTCCTTGTCACC  
TCCCACCCTCTCTAGCCCCAATGCACAGGTCTTCTCTAGGCTGGTGTTCCTCCAGGAGA  
TGCCCTCTCCAGGAGAGACTAGGCCAGAGCTCCAGCTGTCTCTCCAGGGGAGTTGCGC  
AAACAGCGCCTGTGTCTCCAGCAACGGTGTGGAGCGACATGCAGGGAGTATTGTCAACC  
AGGGCAGCTCACCCAGGCCCGGTGTCCAGGGCTTTTCTTGCGGTGGTTTACAGAGCCAT  
GCTGTGGTCACGTGGCTGGCCTCCATCTCCAGCCCTCTGGAGGTCCAGCTGTTAGTGTAG  
CCTACGGGGCACGGTCCCCAGCCCCCTGCCCACTGAGCCATGCTGCTCTCAAGCAGGAT  
GTTCCAGGGGCTTAGCGATCCCTCCCAGGAGCCCTTGTGCACCGCGTTTCCACTCGGGCC  
ACTCCCTGGGCCCTTTGGCTGAATGGAGCTCCATGGAGGATCCGCTTATCTCTGTCTTCA  
TCAGCTCTGACTGCCATAGCAAAAATACCATAGACTGGGAGGCTTAGACAACAGACACTTA  
CTTTCTCGAAGTCCCGGAGGCTGGCCCAGAGCTCCACGTACTCCTGAAAATGCATCTCAG  
CCCCCGGGGGAACACTACGCCAGTTCTCCAAGGGCTGCCAGTTCCCGGGGGGACTGCTC  
TAGCTTTACTCCCTTTGCTTAGTCACAAAAACAAATGACATCCTTTGGAAGAAGGAGGCC  
GGCGTCTCCCTCTGGAGAGGGACCTTACACCAGGCAGATGCTGCTCAGCCTGGCTCTCAC  
GGCCACTTCCGTGTGGCTCCCCAAGGTMATTGCCACCATCCCCACCAGCCAGCTCAAGTG  
CCTGAAGGAAGCCGGGCACGGGCCCCGGGAAGGACGAGATGACCGACGAGGAGCTGGCCGA  
AGGCGAGGAAGAGATCGACCATGCCGAGCGGGAGCTCCGCAGGGGCCAGATCCTCTGGTT  
CCGGGGCCTGAACCGGATTCAGACGCAGGTAAGCCCCGACTCGCTCTCGCCCTGGCACTT  
CCACCCCAAGAGGGTAGAGGCAAGCTGGCCAGCAGCAGCCGAGAGCCGGCCGTCTGCACC  
CGACACCCACAAGGAAACCCCTTTGGTCTTGCTGCCAAGGTCACAAAAGCAGCTGCCAGTG  
TCCCCTTTGCCATTCCGGGCTGTGCCCGCTGATGGCTGTGGCACTGAGATCGCCTCTCCC  
TGACAGCTCCTTCAGAGCCCAGGCATCCCCTGTAGCTAAAGGTGTGTGTGGGTGACTAAT  
GGCTCTCTCAGAGGCACAGGCCAGCACCGTCCCTCATCACTGCTGGGGCTCCCTTCACTTG  
GTGGGAACGGCCCCAGGTCATAGGCAAGTGACAGTATCGGGAAGAGAGGCCCATTTCAA  
CAGCCACCAGCGAGCTCAAGGTTCACTGGTTGACACTGTAAATGCGATGGGGAGACTTCA  
TTTGGGAAGTGGACTCTGGCCACCGAGTTGGTCTTTCTGGTTCATCCAAATCACCAGGG  
TTAGGGCCGGCCAAGACCAAGGGCGTCAGCTGTGTTCCCTCTCTGAAGTCAGATGGCCACC  
ACTGCCACCAGTATCAGGCGCTTGCCAGAGCTACCATGCTCCCTTGTTCCTATCTCCTCC  
CGGCCAACAGTTTTGCCAGAATGCTCCAGACTCGCTGTGTCTCCACACCCCTCCCTGGAA  
CTCTCTTGTGATCCCCTACAGCCTGGCCTCTGCCACCACTCCCCAGAAACGGCGCTCG  
CCTAGGCCTGCGAGGCTCCCTTCCGGCTCGTGGGGTCCGGCTGTCCCTGCATCGTTCCCTG  
CCTGCTGTGGGCACTGCCTGGAGACTTGCTGTCTCACC CGCCTGGCACCCCCACCTCCT  
GCTCAGCCCTCGCCCCACCCTGCTGTGGCCCTTGAGTGTGAAAATCCTGGCCGGGGAGG

**Intron 20 - 21**

AAGAAAGGGCCCATGGGGACCCACCTGCGGCCTGGCCCCTCTCCCACCGCAGCCCCTGC  
AGCCTCTCCTTCATGGCCTGCCCTCCCCCAGCAGCCTCCAGAGGGCCACCCAGCATGCT  
TCACACTCCACCTCCTTCTGCAAGGCCCTGGGCCACCATCTCTCAGGTCACAGCCATCACT  
CCCTGCCCTCCAGGCCCTGTCCAGGATCCCCAGTTGCAATGCCCTGACATGGAGCGAC  
TGACCCTCCTCCCTGAGGTCCTGCCAGAGTAAGGACACCACTGCACACTTGGCTGCGGAG

CCAGGGCCCGCCTGAGCCACCAGCCCCAGCTCAAGCGGGAATAGGCGGGGCCTGAGGCCA  
CACCCC**TTCCC**AGGGTCAGTCACACATCACCAAGGGCCTGTCCCAAAGAATCATCCATGC  
AACTTGCACAAAGCTGTTCTTGGTGCCCTGGGTCTGTG**TTCCC**TCCCAGTGGTCTCAAG  
GGCCGAGTCTCAAGGGACCCAGCCTCAGGGCAACCCCACTCCCTGGGCCTCAGCCTCCTT  
TGCTTGCCCTTGGCTCAGCTCAGCCCCCTCCAAACACCACCCTCTGCAGTGGGACTGGTGGAG  
CCTCTCTCCATTGTCTAAGGATGAAGTCTACGCTCCTGACCATGGCCTTCAAGCCCCTG  
CCTCTTGGTGTACCCCCAACCTTCCCTGCACACCTGCACCCCTGCACCCCCGGCTGCCTTT  
CCAATCATGCCCCTCTGCCCCTGTGCCACTGCACCTCCCCAACTCCCCTGCGTGCCTCCCCT  
GGGCCCTCATGCTTACAAAGCCCTCTTTGACTCCTCTCACTCTCACCACGGGCTCCTTGC  
AAAACCTTCCAGAGCTACAGAGTCCCCCAGAGACCACGATCACGCAGGGCTAGGTCAAGG  
GGCAACAAAGAACTCCACATTTCAAGAGCCCCCAGGGGTCCAAGGGGCCTCTCCAGCTG  
AGAACCGGGAGGCGAGGCTGGCATCCTAGGCACCGAACACAGCGTAGCCTGGGAAGGATG  
TGTTAGGTCTGGACTCTGAACACTGTCACCTATGCCCTGGCCTGGCCAGAACACAGAGAG  
CCCCGGTGAGGAAGGGGAGCAGGCTTTGTGCGCAGATGGCCTGCGTCTCCCCTCCCACGT  
GCAGGGGCTACTGCCTCAAGCACAATGCTCGGACAGGCCAGGGGTGCAGCACAGATAGTC  
TGTTCTCG**TTCCC**TGCAATAAATATTTCTGCGCTAAATCTTAAACACATCGAATGTTAGA  
AGCAGCATTCACATCTCCCCAGTGCCCTCCTAGCGGCCCAACTGTGCCTTCTACGAGAC  
CATGCCTATGGGCCCCCCAGCTGCCCCAGATGGGCTCTTATCTATCGTACCCCTGTTGT  
GCTACAGAGCCCAGAGCTGCCCAAGCCTGGGGTGGGGGGTGAGGACAGCAGGACCTTGCC  
CCTCGGCGGCCCACTTCACTCCTGCCGCGCAGCCGAAGGCGACGTTAGGTTTTCCAGCA  
GCTGAGACAACAGCCCTGCCCTGACCTGAAGCATCAGTGGTGTGAGTGGTACCCCGGCCA  
CCTGTGTGTCTCGTGTCTCTGTATGTGGGGGCCGCTGCAGCCTGGCTAGTAGAAGCGAG  
TCCCATCGGTGAGAGTCTTAGAGTTCAGGCTGTTCCAATTGTCGGTGTCTCACAGAGACA  
CGGGCAGCTGAGTCCCCTGTTTTGCGTATGAG**GGAAA**CAGGGTGCCTCT**TTCCC**CCTGGC  
ACCAGCCGATCCGACTCTTCCACGGGCTCCTGACCCCATGGCTTTTTCGCTTTGACTTTG  
TCACATCCAACCTACCATGTTTTCTCAGGAATGCTGAACCAGTCGGTCTTTTTAGCCAGCT  
ATGTAAGAGCATCTGCTCTCTTTGATTGAAACACCTGCTTGAAAAATGGAGCTAAAGCT  
TGGGAGAAGCCCGTCAGGTTGTACGTATGCCCAAGCCAAGAAAAACATTTCCCTAGGCAG  
CTGGCCCCAGGTTTTCTGCTTTTTGGGAACCACAAAATCGCTCCCCAGATTTTGGAGGCCG  
GCACAAGCTTTTTCTGTTGCTAAGTGAAGGCATTTTGTAACTGCTCGCACCATGGTTCCA  
TACTAACATATCAACGCACCAGATGGACAGGGTGTCAATCCAGAATAAAAGAGTCCTTCA  
AACCAGAACATGTAGCTTTCTGAAGCGCTCATGACTCGGTCTGTCTTTTTTGCATCCCA  
TTATAATGCAAAGAGAAGCTTCGTGAGCAACTGGGCCCTGCTCCCGGCTCAGCTCTTGGG  
CTTCCAGGTGTGGGGTGGTGGCGACTGTGGTATTGTCACTGATGTGGCTCTCCCACTGGG  
ACACCATCTGTAGCCAGGCCAGACCAATGCAAATCTGAGGCAG**GGAAA**GGCATCTTTCCTA  
TCCCTCATCACTTTTGGCGCAGCGAGAGTCCCTCTCCTGAATCTAGACAGGAGACCCCCCA  
CCCCGCAAGCCACCGCGACGCCATCACATCAACCATCCTCCTTCCGTGCGCTGACACACT  
CAGTATGCATTCCTCACGGTCGCAGCAAGTGCCATGAGG**TTCCC**CCTGTGACAAGCAAGC  
GAGTGGGATGTGCTGGGCGGAAGGGGACTGGGCAGGCTGAGAAGAAGGAGGAGTCTTTTC  
CACAGCGGTCAAAGGCTGAAGTGGCGTACATCCTCATTTTTGGCCGGTGCAGGGGGAGTC  
TGAACACTCAAGCTGCCTTCTTCCACGAAGCCCTGGCCCCGTTTCAAGACACCAGGTGAA  
CCTGGTGGCCACCACATAGCACTGCAGGGCTCGGGCTGGAGCAGGTAGCTTTGGGCTCCA  
GATGCGCACACTGGCTTTGCTGTTACATCATCTCCAGTGAAGACGGACATGAGTCCCCAT  
CCCAGCCAAGGGCAGGTCA**GGAAA**TCCAAAGACACTGGGTCAAGGCCCTCCTGCAGGCCT  
CAGT**TTCCC**CAGCCTTGCT**TTCCC**CCTCAATTTGCAGGAAGCTGTAAGAGTGGGGACAAAG  
CGAAGCCACGGCTGCCAGTCCGTGG**GGAAA**ACCCCTCCTCCGCTAGGTCCATTCTTCTGC  
TGAAGTTTCGAGGGGGCGCCCCCTGCCAGTCACTCAGATGAGCCACAGAAGCTGGCGGA  
GACGGGCAGGCGGATGGAGCATGGGGCATAAGTCTCCGGGTTTAGAGGAAGCAGGGCGG  
GTTCTAATAGGAGCGTGTGATGTCCTCAGGTGTGTTGGAGAG**GGAAA**AACAAGGTTGAGA  
ACTATGAAGTACTTCCCTGATAAGTGGCTTGCAAGGGGCATTTCTGACATGTTTGCAGTGT  
GCCCTGACTTGTGACCCCC**TTCCCTTCCA**ATCTCATGACCACTAACCATCTGCTCAGCA

AACCCTCTCTCGGTGGGTGGCACAGAGGCTGGCCTCAGTCAGGGCCCTGTCCAAACATCG  
CCAGCTCCCAGTGAGCGGGGTGACCCGATGAGGCTTTGCTGTCACCCTATGTGCCAGTG  
GTGGCCCCATCCTCGCCAGCCCTCCCCTCCGTGATAGCCTGGACAACAGTGCAAGCCA  
AACTTTATCTCATTTTCTCTCCACAG**ATGGAGGTAGTGAGTACCTTCAAGAGAAGCGGT**  
**TCAGTTCAGGGTGCTGTGCGCCGGCGGTCTTCGGTCTCAGCCAGCTTCATGAYGTAACC**  
**AATCTTTCTACCCCTACTCAGCAATTCTCTCTGCTGCCAATCCTACCAGTGCTGCTGGG**  
**AGTGAGTCYTGACTTCCCTTTTCTCTCATAAAATGGCATCTCTGGGGAAGAATAAGCCTCC**  
**CCAGCTCGGCCTTCTCTCTTTTGCAGTCTTGCATTCCGCTCACCGTGGCTTTTCTGTTCT**  
**TTCTTTACCGCCCTGTCCAGTCTTCCCGCCAGACGGTGTCTCTCGAAAGCCATATTCT**  
**TTTATGAAACGTATTCAACCCATGGCA**CTTCCGGACCTCCCGTTCTTTGCTTTGTTGGT  
TTTTCGGTTTGTGTTTAGTGCTCCTTGTGCCATTGGTTCTCTTTTCTTGAACCTTGTCTGC  
CTTTGCCGATGGTTCTTCATGAACTTGGGCCGCTTCTGGGGGTGTCTGGTGTGAGGCTAG  
GGCCTTGCTCAGTGTTTGTGAGTGGTGCAGCATCAGGGCAGCACGCGGGCTCAGGGCCGCCTT  
CCCGGGGCTGGAGGGGTGGCGGGTGCC**TTTCCC**ACACTGTTTGCCACAGAAGAATCTAGC  
CCACGTACCCAGGAACCTGGAGCGGCGCTTCCAGCATCCTCCTTGAAGTGGTTTCCTAAGG  
ATGCCGCTGTCACCTGTCCCCAGGTGGGCTCAGTGCTGACCAATCACTACTGCACAGGTG  
GTGCCTGCCCTGTAGGCCTTGCCCCAAGCCACCGGGTGTAGAGG**TTTCCC**CAGAAGTGG  
CACTCAGAGGCCTTCAAGACGTTGCCA**GGAAATTTCCC**ACCATGTTGGTACAGTTT  
AAAGAGAACCCAGGGGCTGTCTAAGGAGGTAGAACTTCCAGAATTGCTCACATCTTTT

**PMCA3: 21 NFAT motifs**

## Splice region in PMCA4 gene (ID: ENSG00000058668)

### Legend:

**GGCGTGTGGGTGTGG** - exon

**TTTCCC** - NFAT binding motif

**GGAAA** - NFAT binding motif

**TATAAA** - TATA box

alternative splicing region

**R** - Altered nucleotides recognized during splicing

### SEQUENCE BEFORE SPLICED EXON 36 bp

#### Intron 1 - 2

GTAGGATATTTGTATATTTGCTTTTTTTCAATCATTCAATTTTATGAACATGGGGTCTAA  
GCAGATTTCAAACAAAGACCATT**TATAAA**ACTGGACCATTTTAATGTTTACAATGTAAT  
AAATCTCTTGATTGCAGACATATATGGCTGTTGGTAGAAACATTACAGTAATGGCAGTT  
TTTTCAGTTGGTGTGTAGTCCCCAATAATTATATATGAAATTGCTGTCAAACCAGTAAGA  
CTGCATTTATGCAGCCATCATTTT**CAGG**ACTGTTGGTAACCTGAGCATATTTTCTCCAAA  
TAACTTTGCCTCCTTGTGTCACAAGGCCAATTCGCTCACATTTACCTCAATGACAATAT  
CTTTGGTAATAACACCCACAGTTGTATACGGTGGGGATGAGGGATTCTTCTTTACACCAA  
GTATTGGTGGGCAAAGGTGGCTTT**CAG**TTCAAGATGTAATACATGGGCTTTCTTGAAAT  
GCATATTGGCCTGATCAGTCTTCTTATTTAGGTGGTTTTCTTGTAAGCCATCTCCGAC  
AAAGCAGAGTTTAGTAACCACCCTCTCCATGCCTTCTTCTTCTC**TTTCC**TGTTCAAAC  
AACTTTTAATACGTCTGTTTCTCCCTGGGCATGACTTTAGTCAGAGGGAC**TTCCCG**TTT  
TCCCACCTTCTCTTTTCAATTTCTGTTTAATCATATT**GGAAA**GTAAGTTGGCTCGAGATTG  
TCCCTCTCTGTCCAGCAGATAAG**CAGG**TACTGCTCCCTGTGGAGTCTTTTCATCCTTCTT  
TTGTTTGGTGTCTCTTTTCAATGCATCTTGATAGTCTTTTTCATTTGTATTTTCTCAGC  
ATGACACTGTTTAAGGTAAAGCTTAGCCCTCAGACCAATCATTTGCTTTGCCTTCTTTGA  
ACGTTTCATGAGCCTCTCGTTCATAAGCCTCTCAGC**TTTCC**TTCTTTCTTTTCTTCTCATG  
GTAATCCAAACGGTATCCATAGTGTATGTTATGGTGTAAATCAATATATTCGTTCTGTGGCAT  
GGTGACAGGCGCAGAACCACCAGGAGTAGCCCCTGAGGTGCGAAAACACTCTCAATTTTA  
AGGTCTCAGAGACTCCACGCAGGCCGGGACAGGAAAGGGTCACCCTTTTTTAAAAATATT

#### Intron 4 - 5

AGTCTCCATGTAAGTCTCGGCCATTGCTGTCTAGATAGGGCCCATGGGAACAGCCATGAGA  
TAGGGTTGAAGGAGTTGGAGGACCCTACCCTCAGCCAGTCTCTTACTATCTCCTTCACTG  
TCCCTCC**TTCCC**CTTTGTG**Y**CTAG**GTGATCTGCTGCCTGCAGATGGAATCCTGATCCAA**  
**GGGAATGATCTGAAGATTGATGAGAGCTCTCTGACAGGGGAATCTGACCATGTCAAGAAG**  
**TCCCTGGACAAAGACCCCATGTTGCTCTCAG**GTA**Y**AGGCCCTGGCTGCCCAAG**TTCCC**AT  
TTACCTCCCTGCAAACACCTAGGCCACAGGATCCAGACCCTGTTCTCTCCTCTGACTCTG  
TCCCATCTCC**TTCCC**TGGGGTTCAGCTGGGGCAACAGCATTTTGGTGGGTGGAATACAAG  
GATATCAGGCAGCCTAAATGAAGTTTTCCATGAAACAAGTGTATAAGGGCCTTGAAGGG

#### Intron 5 - 6

GCTTTGCTGGTTGCAGGGGTGGCGGGGGCAGGAGGGAGGGCTTACCCTAAAGCGGTTAGA  
CACATTTTCTCCTTACTCCCAATTTGTCTGGTCTGTTTTAAATGCGCCAGCTCTTGAC  
CTTTTCTTACTGTGCTAAGCACATCATATCCATGGGGTAGGGAGGAGTATTTTTTCTTC  
TAAGTTTGTGTTTCATACCAATCATGTCTAGGTATTAATAAACCATTCC**TTCCC**ATCT  
TCTCCTTTCC**Y**GTGTAG**GGACCCATGTCATGGAAGGTTCTGGCCGGATGGTGGTGACAGC**  
**TGTTGGTGTCAACTCTCAGACTGGAATCATCCTTACTCTCTTGGGGTCAATGAGGATGA**  
**CGAAGGGGAGAAAAGAAGAAAG**GTAAGGGGCATCTGGAATGAGATTCTCTTCTCTCA

TCCCCATGGACAAACAAGGAAGCGAGGGAGCAGATCTGGATAGAAAGCATGGTTGGAAGA  
ATCTGCTGCCATGAAGAAAGCAGATATCCAAACTCCTTGCTGAGATAAAGATGTAAATCC  
TTGGCTCCAGGGAGCTCTGATGAAAACCAGATCCTGGCTCTAGGCTCCCAAATCAGGTTG

**SEQUENCE AFTER SPLICED EXON 175 bp**

CTTATCCCCTATAGGCAAGACAACAAATAGAAAAGT**GGAAA**AGAGGCCGGGTGCGGTGGC  
TCACGCCTGTAATCCCAGCACTTTGGGAGGCCGAGGCTGGCAGATCATAAAGTCAGGAGT  
TCGAGACCAGCCTGGCCAACATAGTGAAACCTTGGCTCTGCCAAAAATACAAAAATTAGC  
TGGACGTGGTGGTGGGCGCCTGTAATCCCAGCTACTCTGGAGGCTGAGGCAGGAGAATCG  
CTTGAACCCGGAAGGCTGAGGTTGCAGTGAGCTGAGATCGCGCCATTACACACCAGCCTG  
GGCAACAAGGCAAGACTCTGTCTCAAAAAAAAAAAAAAAAAAGAAGAAGAAAAGTGGATT  
GCAGACTCACTATGCACCTGACTGTACTTCCAGGCAGGTGCTTTTTCTGTCTGCCAGAGA  
AACATTCCAGGGTGTGTGGCTGCCTCACCTATCCAGGGCGATGCAGCTCCCTGGGGACA  
CAGGTGCTTCCCTGGGGAGCCCTGAGCACTTCTCCGTGTTGCTGGCCTCACATCCAATTGG  
GCAGGCATTGGAGTCCGGGCACTGCCTGGAGCTCACCAGAAGGTGCTTTACAGTGGTCCT  
TGGTTTGTCTCTCAGAGGGCTTGGTCCCCTCTGCTGTGAGGCTGGACTGCAGCTGTGGTG  
GCAAGTGACCAGATGTCAGTACTGAGCAGCCTGACCATGGTCTAGGTGGTGCTTGGATGCATC  
CACTTGGCTTCCCTTGGTCATTGAGTTTCAAGAAGAGAACTCCAGGAGACGGCTTGGCC

AATGCAGCTTTCAAACGTCCTAGTTGCCGTCCTCACCCAGCCACCCCACTGCTTGA  
AAGTTGAGCCATGTGATGTTTCTAGTGCCCCATGATCTCTTCTGATGTGTGTTTGGTTTT  
GATGCTGAGCAGTCATGTTTTATAGTCTGGGTTTTGTTTCTCTCCTAAATCCACCATCTC  
CTTGTCTGCCGGCCAATTCTCACCTCTCTATTTTCTCATCCTCCTTTTCC**TTCCC**CTGG  
TAYAG**ATCAAAGTGGTCAAAGCGTTCCATAGTTCCCTCCACGAAAGCATT**CAGAAACCCT  
**ACAACCAAAGTCCATCCACAGCTTCATGACCACCTGAATT**YGCCATAR**AGGAGGAGT**  
**TGCCACGAACACCCTCCTGGATGAGGAAGAGGAGGAAAATCCTGACAAGGCTTCTAAGT**  
**TTGGGACTAGGGTGTCTGTTGGATGGTGGAGGTCAT**YCATATGCCAATACAAACAACA

**PMCA4: 10 NFAT motifs**
